# Supplementary material
Source: PubMed Central journal article supplement (PMC4886726)
Supplement: NIHMS650376-supplement-supplemental.pdf [file NIHMS650376-supplement-supplemental.pdf]

# Supplementary Material for Structures and Free Energy Landscapes of Aqueous Zinc(II)-Bound Amyloid- $\beta$ (1-40) and Zinc(II)-Bound Amyloid- $\beta$ (1-42) with Dynamics

*Olivia Wise-Scira<sup>1</sup>, Liang Xu<sup>1</sup>, George Perry<sup>2</sup>, and Orkid Coskuner<sup>1,2\*</sup>*

<sup>1</sup>Department of Chemistry, and <sup>2</sup>Neurosciences Institute, The University of Texas at San Antonio, One UTSA

Circle, San Antonio, Texas 78249

Email: [orkid.coskuner@utsa.edu](mailto:orkid.coskuner@utsa.edu)

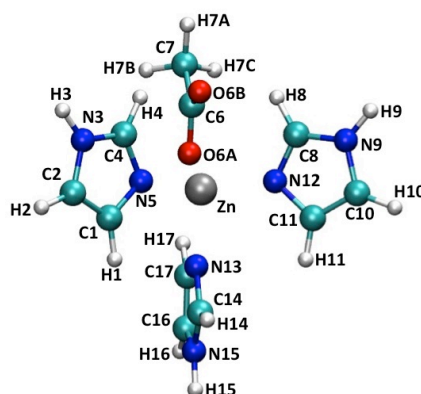

**Figure S1.** Optimized structure of the Zn:His<sub>3</sub>Glu model structure using the B3LYP functional along with the 6-31G\* basis set. Each of the atoms are labeled according to the atom names used for the parameters in Table 1.

| Atom | Partial Charges | Bond Distance/Å         | Calculated | Experiment |
|------|-----------------|-------------------------|------------|------------|
| C1   | 0.022           | r(Zn-N5)                | 2.0        | 2.1        |
| H1   | 0.119           | r(Zn-O6A)               | 2.0        | 2.1        |
| C2   | -0.197          | r(Zn-O6B)               | 2.4        | 2.1        |
| H2   | 0.210           | r(Zn-N12)               | 2.0        | 2.2        |
| N3   | -0.177          | r(Zn-N13)               | 2.1        | 2.3        |
| H3   | 0.341           | Bond Angle/Degrees      | Calculated | Experiment |
| C4   | 0.109           | $\theta$ (Zn-O6B-C6)    | 80.8       | 85.1       |
| H4   | 0.118           | $\theta$ (Zn-N12-C8)    | 122.5      | 125.0      |
| N5   | -0.302          | $\theta$ (Zn-N12-C11)   | 130.8      | 126.5      |
| C6   | 0.626           | $\theta$ (Zn-N13-C14)   | 134.5      | 126.4      |
| O6A  | -0.502          | $\theta$ (Zn-N13-C17)   | 119.0      | 124.5      |
| O6B  | -0.502          | $\theta$ (Zn-N5-C4)     | 122.6      | 122.0      |
| C7   | -0.459          | Torsional Angle/Degrees | Calculated | Experiment |
| H7A  | 0.139           | $\phi$ (Zn-N5-C1-H1)    | 1.5        | -3.5       |
| H7B  | 0.139           | $\phi$ (Zn-N5-C1-C2)    | -177.6     | 176.5      |
| H7C  | 0.139           | $\phi$ (Zn-O6A-C6-C7)   | -180.0     | -177.4     |
| C8   | 0.109           | $\phi$ (Zn-O6B-C6-C7)   | 180.0      | 177.4      |
| H8   | 0.118           | $\phi$ (Zn-N12-C8-H8)   | 1.0        | 8.6        |
| N9   | -0.179          | $\phi$ (Zn-N12-C8-N9)   | -177.8     | -171.4     |
| H9   | 0.341           | $\phi$ (Zn-N12-C11-H11) | -1.7       | -8.8       |
| C10  | -0.197          | $\phi$ (Zn-N12-C11-C10) | 177.5      | 171.2      |
| C11  | 0.022           | Energy/Hartree          | -2685.97   |            |
| H11  | 0.119           |                         |            |            |
| N12  | -0.302          |                         |            |            |
| N13  | -0.302          |                         |            |            |
| C14  | 0.109           |                         |            |            |
| H14  | 0.118           |                         |            |            |
| N15  | -0.179          |                         |            |            |
| H15  | 0.341           |                         |            |            |
| C16  | -0.197          |                         |            |            |
| H16  | 0.210           |                         |            |            |
| C17  | 0.022           |                         |            |            |
| H17  | 0.119           |                         |            |            |
| Zn   | 0.695           |                         |            |            |

**Table S1.** Calculated specific structural parameters, electrostatic partial charges and energy of the model Zn:His<sub>3</sub>Glu metal-ligand moiety with the B3LYP/6-31G\*//B3LYP/6-31G\* method.

The enthalpic contribution to  $G$  is calculated by the sum of the molecular mechanics potential energy and the solvation free energy ( $G_{\text{sol}}$ ), which is composed of the solvation-electrostatic free energy ( $G_{\text{sol-elec}}$ ) and non-polar free energy ( $G_{\text{np}}$ ) terms. For the  $G_{\text{sol-elec}}$  term calculations, the internal and external dielectric constant values were set to 1 and 80, respectively and dipolar boundary conditions were applied. The  $G_{\text{np}}$  contribution was calculated using the solvent accessible surface area (SASA) as shown in equation 1.

$$G_{\text{np}} = 0.00542 \times \text{SASA} + 0.92 \quad (1)$$

Most recently, we applied both harmonic and quasi-harmonic entropy calculation methods on A $\beta$  in an aqueous medium. The same thermodynamic trends were obtained using these different methods.<sup>62</sup> Therefore, the widely-used normal mode analysis method was utilized to approximate the conformational entropy values of the full-length disordered metallopeptides. For the calculations of the PMF surfaces, we used the coordinates of the end-to-end distance ( $R_{\text{E-E}}$ ) that is defined as the distance between the Asp1 peptide backbone N-atom and the Val40 or Ala42 peptide backbone carbonyl C-atom and the radius of gyration ( $R_{\text{g}}$ ). The PMF values were then calculated using equation 2.

$$\text{PMF} = -k_{\text{B}}T \log(P) \quad (2)$$

where  $k_{\text{B}}$  is the Boltzman constant and  $T$  is the physiological temperature, and  $P$  is the probability of Zn:A $\beta$  structures with ceratin  $R_{\text{E-E}}$  and  $R_{\text{g}}$  values within  $1 k_{\text{B}}T$  range. More details can be found in Ref. 62. The convergence was verified by calculating the PMF surfaces at different simulation time-scales (see Supplementary Materials section).

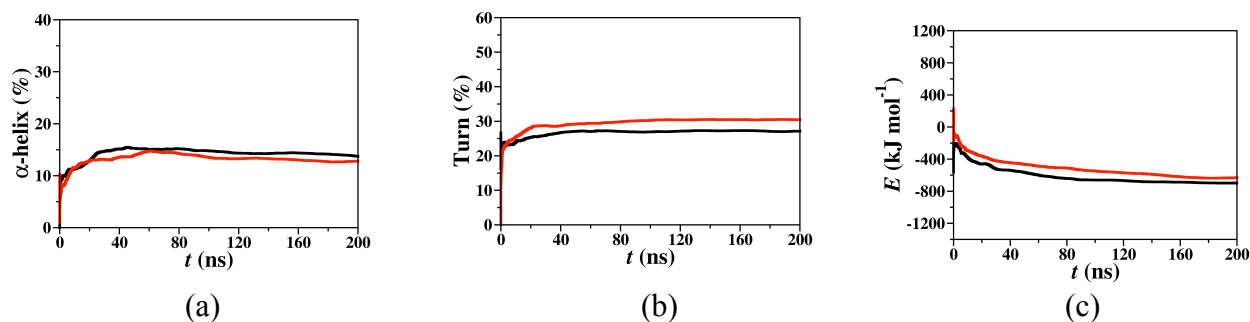

**Figure S2.** The calculated average (a)  $\alpha$ -helix and (b) turn contents and the (c) internal energy ( $E$ ) values with time using the simulated Zn:A $\beta$ 40 (black) and Zn:A $\beta$ 42 (red) metallopeptide structures in an aqueous medium.

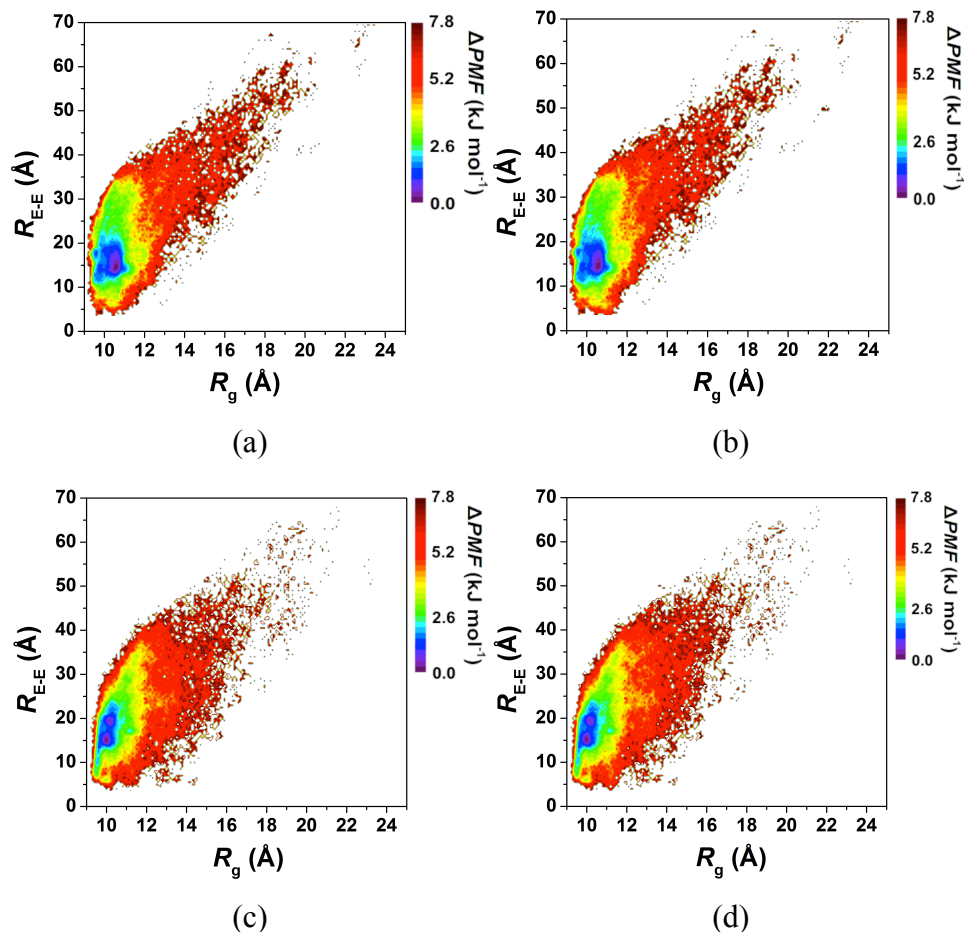

**Figure S3.** The calculated PMF surfaces based on the  $R_{E-E}$  and  $R_g$  values of the Zn:Aβ40 metallopeptide using the structures from the first (a) 150 ns and (b) 175 ns and the Zn:Aβ42 peptide using the structures from the first (a) 150 ns and (b) 175 ns of the simulations.

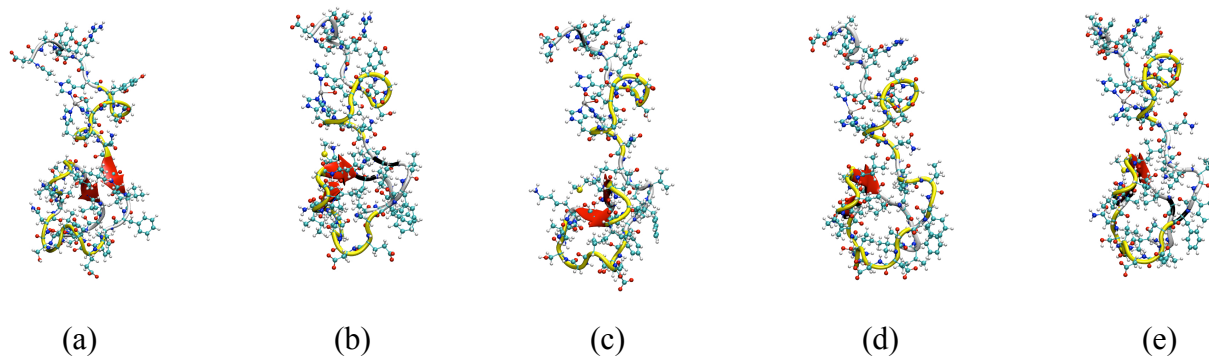

**Figure S4.** Zn:Aβ40 structures (N-terminal extended into the solution) obtained from classical molecular dynamics simulations in explicit water starting from an extended structure at (a) 0 ns, (b) 20 ns, (c) 30 ns, (d) 40 ns and (e) 50 ns. The colors on the backbone of each structures correspond to the secondary structure of each residue as follows:  $\alpha$ -helix (blue),  $3_{10}$ -helix (gray),  $\pi$ -helix (purple),  $\beta$ -sheet (red),  $\beta$ -strand (black), turn (yellow), coil (white).



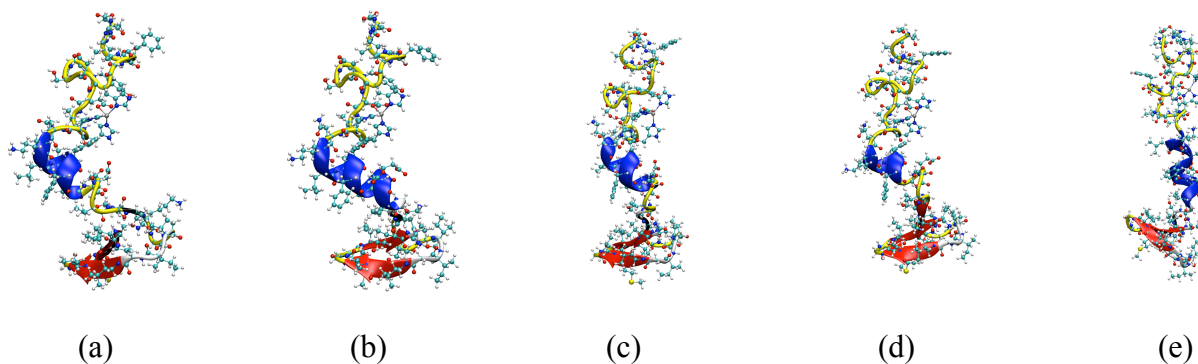

**Figure S5.** Zn:Aβ42 structures (N-terminal extended into the solution) obtained from classical molecular dynamics simulations in explicit water starting from an extended structure at (a) 0 ns, (b) 20 ns, (c) 30 ns, (d) 40 ns and (e) 50 ns. The colors on the backbone of each structures correspond to the secondary structure of each residue as follows:  $\alpha$ -helix (blue),  $3_{10}$ -helix (gray),  $\pi$ -helix (purple),  $\beta$ -sheet (red),  $\beta$ -strand (black), turn (yellow), coil (white).

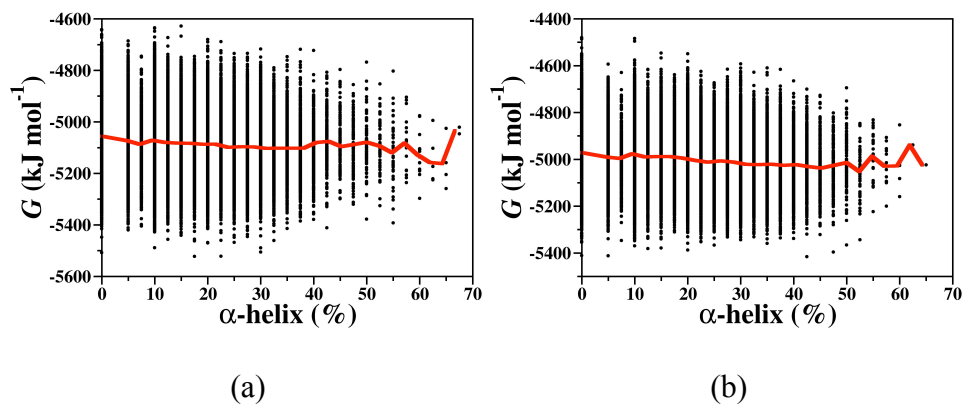

**Figure S6.** The simulated  $\alpha$ -helix abundance and associated Gibbs free energies ( $G$ ) in the structures of the (a) Zn:Aβ40 and (b) Zn:Aβ42 metalloproteins. The red lines on the graph show the average  $G$  for the structures with each  $\alpha$ -helix percentage. No clear trend is obtained between the  $\alpha$ -helix abundance and conformational  $G$  values.

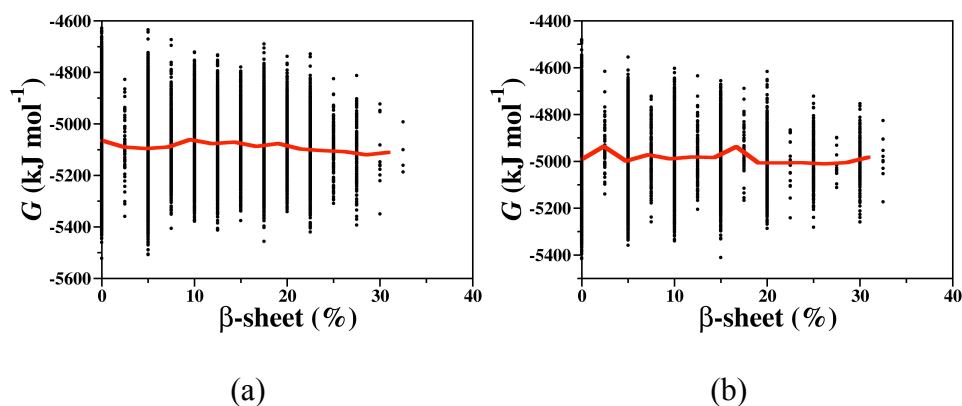

**Figure S7.** The simulated  $\beta$ -sheet abundance and associated Gibbs free energies ( $G$ ) in the structures of the (a) Zn:A $\beta$ 40 and (b) Zn:A $\beta$ 42 metallopeptides. The red lines on the graph show the average  $G$  for the structures with each  $\beta$ -sheet percentage. No clear trend is obtained between the  $\beta$ -sheet abundance and the conformational  $G$  values.

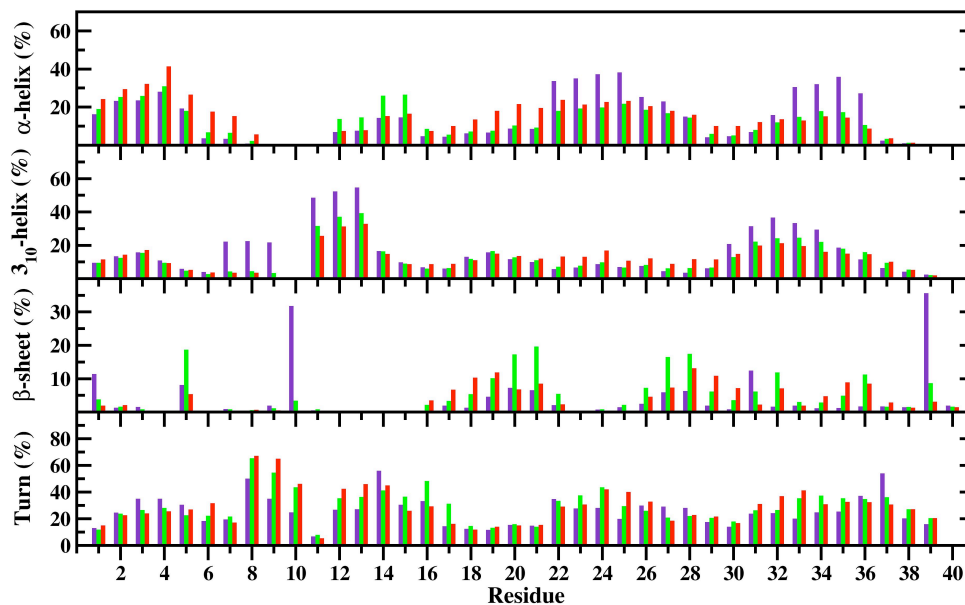

**Figure S8.** Secondary structures per residue along with their probabilities for each basin on the PMF surface of the Zn:A $\beta$ 40 metallopeptide; basin I (purple), basin II (green), and basin III (red). The abundances for the  $\pi$ -helix and coil structures are not displayed.

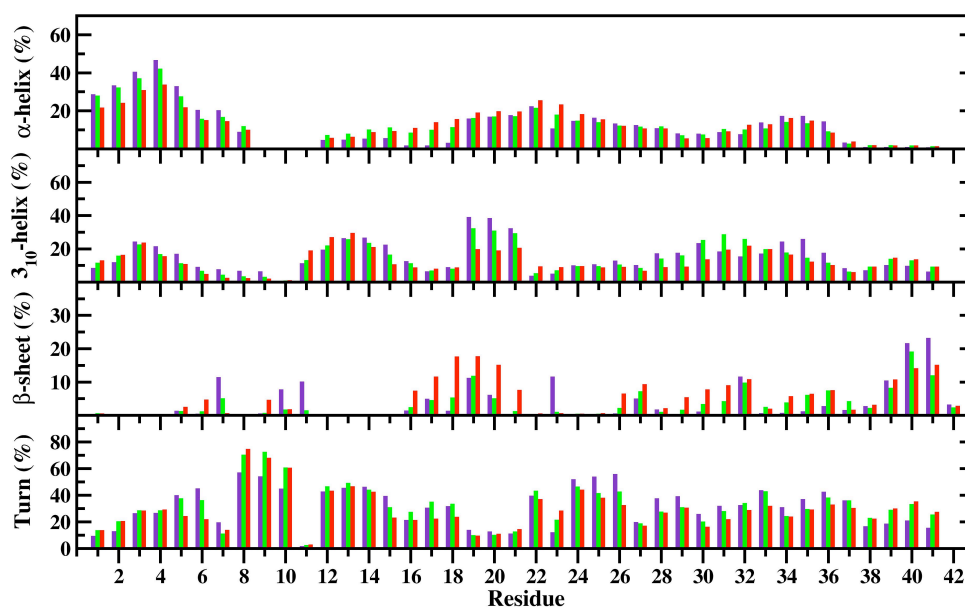

**Figure S9.** Secondary structures per residue along with the corresponding probability for each basin on the PMF surface of the Zn:A $\beta$ 42 metallopeptide; basin I (purple), basin II (green), and basin III (red). The abundances for the  $\pi$ -helix and coil structures are not displayed.

A direct relationship between the secondary structure abundances and conformational Gibbs free energy values could not be established for either metallopeptide without using a structural classification method. Using the PMF surfaces, we find that the helix abundance in the Zn:A $\beta$ 40 structures located in basin I is 28% and 32% larger than those located in basins II and III, respectively. This result might indicate that the Zn:A $\beta$ 40 structures become more preferred with larger helix formation. Utilizing the PMF surface, a trend in helix formation and PMF is obtained for Zn:A $\beta$ 42; structures located in basins I possess 34% and 58% larger helix abundance than those located in basins II and III, respectively. The  $\beta$ -sheet abundance in the structures of Zn:A $\beta$ 42 located in basin I is 11% and 34% larger than in the conformations located in basins II and III, respectively. This finding indicates that an increase both in helix and  $\beta$ -sheet formation stabilizes the PMF of the Zn:A $\beta$ 42 structures, which in turn might be related to the larger entropic contribution in the conformational thermodynamic stability of Zn:A $\beta$ 42 rather than Zn:A $\beta$ 40 (see above). Detailed analysis shows that the  $\alpha$ -helix abundance is 7% - 18% larger in the mid-domain (Glu22-Gly25) and C-terminal (Gly33-Val36) regions of Zn:A $\beta$ 40 for the structures located in basin I rather than those located in basins II and III (Figure 8). Moreover,  $3_{10}$ -helix formation at Asp7-Gly9 and Glu11-His13 is more stable in the Zn:A $\beta$ 40 structures located in basin I rather than in those located in basins II and III. For Zn:A $\beta$ 42, there is a trend between  $\alpha$ -helix and decreasing PMF for the residues located in the N-terminal region (Figure 9). Moreover, residues Phe19-Ala21 and Leu34-Val36 adopt more abundant  $3_{10}$ -helix structure in the Zn:A $\beta$ 42 conformations located in basin I rather than those located in basins II and III. Residues Asp7, Tyr10, Glu11, Asp23, Val40 and Ile41 of Zn:A $\beta$ 42 are capable of adopting prominent  $\beta$ -sheet structure with more favorable PMF values (Figure 9).

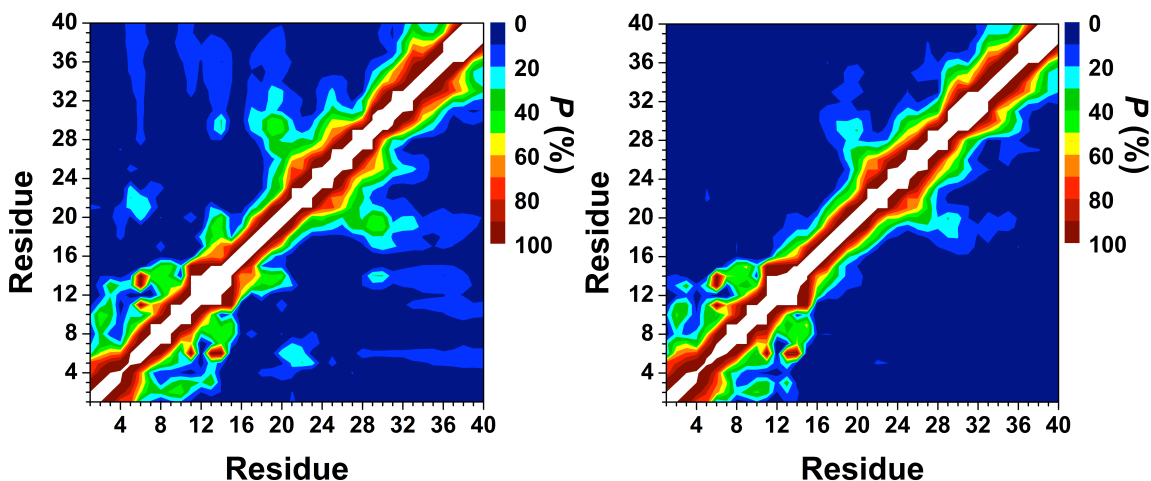

(a)

(b)

**Figure S10.** Calculated intra-molecular metallopeptide interactions in the structures of Zn:A $\beta$ 40 located in (a) basin II and (b) basin III on the PMF surface (see Figures 2a and 2b); the color scale corresponds to the probability ( $P$ ) of these interactions.

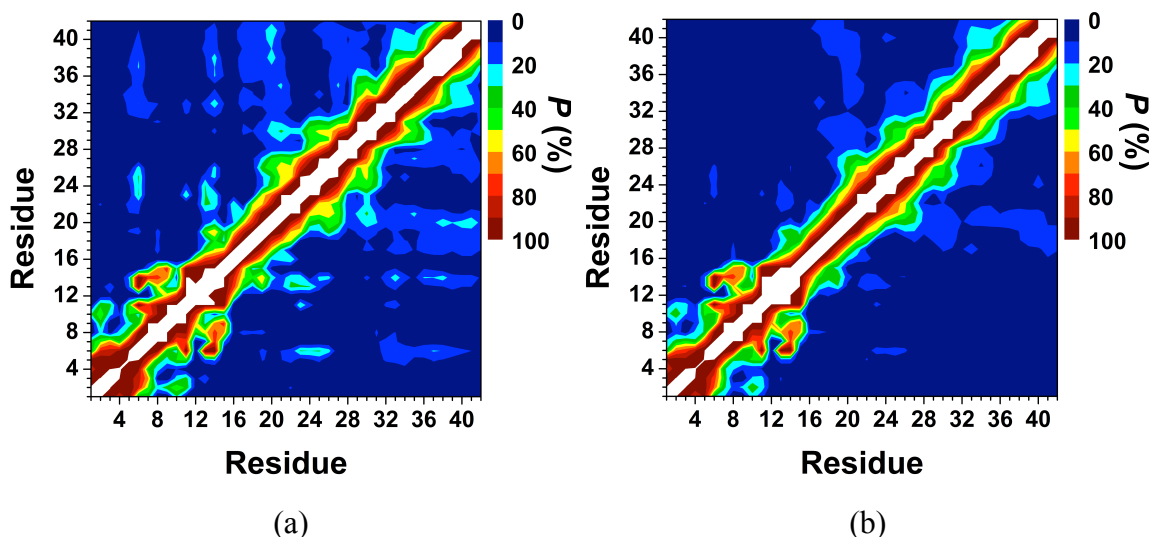

**Figure S11.** Calculated intra-molecular metallopeptide interactions in the structures of Zn:A $\beta$ 42 located in (a) basin II and (b) basin III on the PMF surface (see Figures 2a and 2b); the color scale corresponds to the probability ( $P$ ) of these interactions.

| Donor | Acceptor | R(C-N) (%)           |                      |                      |                      |                      |                      |                      |                      |                      |
|-------|----------|----------------------|----------------------|----------------------|----------------------|----------------------|----------------------|----------------------|----------------------|----------------------|
|       |          | I                    |                      |                      | II                   |                      |                      | III                  |                      |                      |
|       |          | $\leq 4 \text{ \AA}$ | $\leq 5 \text{ \AA}$ | $\leq 6 \text{ \AA}$ | $\leq 4 \text{ \AA}$ | $\leq 5 \text{ \AA}$ | $\leq 6 \text{ \AA}$ | $\leq 4 \text{ \AA}$ | $\leq 5 \text{ \AA}$ | $\leq 6 \text{ \AA}$ |
| Arg5  | Asp1     | 59.5                 | 68.4                 | 69.7                 | 51.9                 | 60.1                 | 61.9                 | 58.6                 | 67.1                 | 68.4                 |
| Arg5  | Glu22    | 12.4                 | 12.6                 | 12.6                 | 14.5                 | 14.9                 | 15.1                 | 8.1                  | 8.4                  | 8.4                  |
| Lys28 | Glu22    | 12.2                 | 19.1                 | 20.3                 | 17.7                 | 27.4                 | 28.9                 | 6.0                  | 9.8                  | 10.7                 |
| Arg5  | Asp7     | 20.9                 | 25.5                 | 29.0                 | 24.1                 | 31.3                 | 36.4                 | 25.1                 | 31.6                 | 36.3                 |
| Arg5  | Glu3     | 15.9                 | 17.2                 | 17.5                 | 22.3                 | 23.4                 | 23.7                 | 21.1                 | 22.2                 | 22.4                 |
| Arg5  | Asp23    | 8.2                  | 8.7                  | 9.0                  | 18.5                 | 20.3                 | 21.9                 | 7.9                  | 8.6                  | 8.9                  |
| Lys28 | Asp23    | 4.6                  | 6.8                  | 7.6                  | 3.6                  | 5.2                  | 5.8                  | 4.6                  | 7.0                  | 8.0                  |
| Lys16 | Glu22    | 0.3                  | 0.5                  | 0.6                  | 0.7                  | 0.9                  | 1.0                  | 3.9                  | 5.3                  | 5.6                  |

**Table S2.** The formed salt bridges in the structures of the Zn:A $\beta$ 40 metallopeptide located in basins I, II and III on the PMF surface; R(C-N) is the distance between the carboxylate C atom and the side-chain or N-terminus N atom.

| Donor | Acceptor | R(C-N) (%) |       |       |       |       |       |       |       |       |
|-------|----------|------------|-------|-------|-------|-------|-------|-------|-------|-------|
|       |          | I          |       |       | II    |       |       | III   |       |       |
|       |          | ≤ 4 Å      | ≤ 5 Å | ≤ 6 Å | ≤ 4 Å | ≤ 5 Å | ≤ 6 Å | ≤ 4 Å | ≤ 5 Å | ≤ 6 Å |
| Arg5  | Asp1     | 86.1       | 98.3  | 98.8  | 82.8  | 92.2  | 93.5  | 74.6  | 84.9  | 86.0  |
| Arg5  | Glu22    | 13.5       | 13.7  | 13.7  | 15.9  | 16.2  | 16.2  | 15.0  | 15.2  | 15.2  |
| Arg5  | Asp7     | 29.8       | 32.3  | 33.8  | 26.3  | 30.7  | 33.7  | 16.4  | 19.7  | 22.1  |
| Arg5  | Glu3     | 1.0        | 1.0   | 1.0   | 6.4   | 7.1   | 7.4   | 10.6  | 11.9  | 12.5  |
| Arg5  | Asp23    | 30.5       | 30.6  | 30.9  | 4.1   | 4.1   | 4.2   | 2.1   | 2.2   | 2.2   |
| Lys16 | Glu22    | 25.3       | 34.8  | 36.5  | 19.1  | 25.1  | 26.1  | 8.6   | 11.4  | 12.0  |
| Arg5  | Glu11    | 1.8        | 8.2   | 35.7  | 2.4   | 7.1   | 16.7  | 1.3   | 4.9   | 11.7  |
| Lys28 | Asp23    | 3.9        | 5.4   | 6.0   | 2.9   | 4.6   | 5.6   | 5.0   | 7.5   | 8.8   |
| Lys28 | Glu22    | 0.8        | 1.2   | 1.3   | 2.7   | 4.4   | 5.0   | 1.7   | 2.8   | 3.2   |

**Table S3.** The formed salt bridges in the structures of the Zn:Aβ42 metalloprotein located in basins I, II, and III on the PMF surface; R(C-N) is the distance between the carboxylate C atom and the side-chain or N-terminus N atom.
